# Supplementary material
Source: publisher site journal article supplement (https://www.dovepress.com/article/351238)
Supplement: Supplementary file 1 [file get_supplementary_file.php]

| **Table S1.** Collinearity diagnostics steps. | | | |
| --- | --- | --- | --- |
|  | Step 1 | Step 2 | Step 3 |
| CVAI | 15.6 | 15.6 | 4.4 |
| Age | 3.2 | 2.5 | 2 |
| Male | 9.3 | 3.4 | 2.7 |
| NC | 2.5 | 2.5 | 2.5 |
| BMI | 3.4 | 3.4 | 3.3 |
| WC | 11 | 11 | NA |
| DBP | 2.4 | 2.4 | 2.4 |
| SBP | 2.2 | 2.2 | 2.2 |
| TG | 1.6 | 1.6 | 1.5 |
| TC | 1.9 | 1.9 | 1.9 |
| LDL-C | 1.7 | 1.7 | 1.7 |
| HDL-C | 1.5 | 1.5 | 1.4 |
| Lp (a) | 1 | 1 | 1 |
| FPG | 1.7 | 1.7 | 1.7 |
| HsCRP | 1 | 1 | 1 |
| Hcy | 1 | 1 | 1 |
| eGFR | 13 | NA | NA |
| Cr | 19.4 | NA | NA |
| AHI | 1.4 | 1.4 | 1.4 |
| Mean SaO2 | 1.9 | 1.9 | 1.9 |
| Lowest SaO2 | 2.3 | 2.3 | 2.3 |
| History of diabetes | 1.7 | 1.7 | 1.7 |
| Drinking status | 1.4 | 1.4 | 1.4 |
| Smoking status | 1.6 | 1.6 | 1.6 |
| Antihypertensive drugs | 1.3 | 1.3 | 1.3 |
| Lipid-lowering drugs | 1.6 | 1.5 | 1.2 |
| Antiplatelet drugs | 1.1 | 1.1 | 1.1 |
| Antidiabetic drugs | 2.1 | 2.1 | 1.3 |
| Regular CPAP treatment | 1.8 | 1.6 | 1.5 |
| VIF: variance inflation factors.  VIF = 1/(1-R2). VIF step-by-step screening method: Calculate the VIF of each variable. If the maximum VIF value ≥5, remove the variable with the maximum VIF value | | | |

| **Table S2.** Hazard ratios and 95% confidence interval (CI) for risk of first myocardial infarction excluding patients on regularly CPAP treatment. | | | | | | | | |
| --- | --- | --- | --- | --- | --- | --- | --- | --- |
| Variable | Crude Model | | Adjusted Model 1 | | Adjusted Model 2 | | Adjusted Model 3 | |
| HR (95%CI) | P-value | HR (95%CI) | P-value | HR (95%CI) | P-value | HR (95%CI) | P-value |
| CVAI (Per 1 SD increase) | 1.65 (1.35, 2.01) | <0.01 | 1.58 (1.27, 1.96) | <0.01 | 1.56 (1.25, 1.95) | <0.01 | 1.53 (1.18, 1.97) | <0.01 |
| Quartiles of CVAI |  |  |  |  |  |  |  |  |
| Q1 | Ref. |  | Ref. |  | Ref. |  | Ref. |  |
| Q2 | 1.30 (0.51, 3.28) | 0.59 | 1.13 (0.44, 2.88) | 0.81 | 1.15 (0.45, 2.96) | 0.76 | 1.20 (0.46, 3.15) | 0.71 |
| Q3 | 2.87 (1.30, 6.35) | <0.01 | 2.49 (1.10, 5.62) | 0.03 | 2.30 (1.01, 5.23) | 0.04 | 2.44 (1.02, 5.86) | 0.04 |
| Q4 | 4.80 (2.24, 10.30) | <0.01 | 3.99 (1.78, 8.94) | <0.01 | 3.76 (1.68, 8.41) | <0.01 | 3.61 (1.49, 8.76) | <0.01 |
| P for trend |  | <0.01 |  | <0.01 |  | <0.01 |  | <0.01 |
| Crude model: Unadjusted.  Adjusted model 1: Adjusted for age, gender, NC, BMI, DBP, SBP, history of diabetes, drinking status, and smoking status.  Adjusted model 2: Adjusted for all the variables in model 1, plus TG, TC, LDL-C, HDL-C, Lp (a), FPG, HsCRP, and Hcy.  Adjusted model 3: Adjusted for all the variables in model 2, plus antihypertensive drugs, lipid-lowering drugs, antiplatelet drugs, antidiabetic drugs, AHI, mean SaO2, and lowest SaO2.  Abbreviations as in Table 1 and 2. | | | | | | | | |

**Table S3.** Univariate and multivariate competing risk analysis

|  | Crude model | Adjusted model 1 | Adjusted model 2 | Adjusted model 3 |
| --- | --- | --- | --- | --- |
| Variable | Sub-distribution HR (95%CI) | Sub-distribution HR (95%CI) | Sub-distribution HR (95%CI) | Sub-distribution HR (95%CI) |
| CVAI (Per 1 SD increase) | 1.59 (1.35, 1.91) | 1.57 (1.32, 1.89) | 1.54 (1.30, 1.87) | 1.52 (1.27, 1.86) |
| Quartiles of CVAI |  |  |  |  |
| Q1 | Ref. | Ref. | Ref. | Ref. |
| Q2 | 0.88 (0.35, 1.94) | 1.08 (0.51, 1.91) | 0.94 (0.38, 1.85) | 1.17 (0.60, 2.41) |
| Q3 | 2.76 (1.52, 4.10) | 1.96 (1.19, 3.98) | 2.46 (1.45, 4.63) | 2.15 (1.16, 4.43) |
| Q4 | 4.76 (2.64, 7.43) | 3.62 (2.03, 6.43) | 3.26 (1.86, 6.05) | 3.11 (1.73, 6.61) |

Crude model: Unadjusted.

Adjusted model 1: Adjusted for age, gender, NC, BMI, DBP, SBP, history of diabetes, drinking status, and smoking status.

Adjusted model 2: Adjusted for all the variables in model 1, plus TG, TC, LDL-C, HDL-C, Lp (a), FPG, HsCRP, and Hcy.

Adjusted model 3: Adjusted for all the variables in model 2, plus antihypertensive drugs, lipid-lowering drugs, antiplatelet drugs, antidiabetic drugs, regular CPAP treatment, AHI, mean SaO2, and lowest SaO2.

Abbreviations as in Table 1 and 2.
